# Supplementary material for: Orienteering experts report more proficient spatial processing and memory across adulthood
Source: PubMed Central journal article supplement (PMC9858405; doi:10.1371/journal.pone.0280435), 2023-01-20
Supplement: pone.0280435.s002.pdf [file pone.0280435.s002.pdf]

**S1 Table. Summarized Responses to the Orienteering Experience Questionnaire**

|                                                                       | <i>Intermediate</i> | <i>Advanced</i> | <i>Elite</i> |
|-----------------------------------------------------------------------|---------------------|-----------------|--------------|
| <i>n</i>                                                              | 42                  | 41              | 31           |
| <b>Q1. Years of Orienteering Experience (%)</b>                       |                     |                 |              |
| 0-5 years                                                             | 24%                 | 10%             | 0%           |
| 6-10                                                                  | <b>29%</b>          | 17%             | 6%           |
| 11-15                                                                 | 19%                 | 12%             | 26%          |
| 16-20                                                                 | 12%                 | 15%             | 19%          |
| 20+                                                                   | 17%                 | <b>46%</b>      | <b>48%</b>   |
| <b>Q3. Weekly Orienteering Training Frequency (%)</b>                 |                     |                 |              |
| 0 times per week                                                      | <b>55%</b>          | 12%             | 0%           |
| 1-2 times per week                                                    | 45%                 | <b>59%</b>      | <b>61%</b>   |
| 3-4 times per week                                                    | 0%                  | 27%             | 26%          |
| 5-6 times per week                                                    | 0%                  | 2%              | 0%           |
| 7 times per week                                                      | 0%                  | 0%              | 13%          |
| <b>Q4. Monthly Orienteering Racing Frequency (%)</b>                  |                     |                 |              |
| 0-2 times per month                                                   | <b>64%</b>          | 39%             | 6%           |
| 3-5 times per month                                                   | 36%                 | <b>44%</b>      | <b>74%</b>   |
| 6-10 times per month                                                  | 0%                  | 12%             | 19%          |
| 11-15 times per month                                                 | 0%                  | 5%              | 0%           |
| <b>Q5. Weekly Virtual Reality, Mapping or Sedentary Map Study (%)</b> |                     |                 |              |
| 0-1 hours                                                             | <b>93%</b>          | <b>76%</b>      | <b>65%</b>   |
| 2-4 hours                                                             | 7%                  | 20%             | 35%          |
| 5-7 hours                                                             | 0%                  | 5%              | 0%           |

|                                                                                   |            |            |            |
|-----------------------------------------------------------------------------------|------------|------------|------------|
| <b>Q6. National Team Membership (%)</b>                                           |            |            |            |
| No, never                                                                         | <b>93%</b> | <b>80%</b> | 26%        |
| Previously                                                                        | 5%         | 12%        | 29%        |
| Yes, currently                                                                    | 2%         | 7%         | <b>45%</b> |
| <b>Q7. Highest Competition Level (%)</b>                                          |            |            |            |
| < International                                                                   | <b>88%</b> | <b>61%</b> | 16%        |
| International                                                                     | 12%        | 39%        | <b>84%</b> |
| <b>Q8. Participation in Orienteering Disciplines</b><br>(% Endorsed)              |            |            |            |
| Sprint                                                                            | 79%        | 88%        | 100%       |
| Middle                                                                            | 90%        | 100%       | 97%        |
| Long                                                                              | 60%        | 95%        | 97%        |
| Forest Relay                                                                      | 7%         | 54%        | 87%        |
| Sprint Relay                                                                      | 21%        | 51%        | 84%        |
| Ultra-Long                                                                        | 7%         | 37%        | 71%        |
| Rogaine                                                                           | 38%        | 66%        | 32%        |
| <b>Q9. Use of Compass (%)</b>                                                     |            |            |            |
| Sometimes or never                                                                | 29%        | 10%        | 3%         |
| Yes, always                                                                       | <b>71%</b> | <b>90%</b> | <b>97%</b> |
| <b>Q10. Adventure Race Participation (%)</b>                                      |            |            |            |
| No, never                                                                         | <b>69%</b> | <b>61%</b> | <b>65%</b> |
| Yes, at least once                                                                | 31%        | 39%        | 35%        |
| <b>Q11. Map and Compass Use Outside of Orienteering</b><br>(i.e., Work, etc.) (%) |            |            |            |
| No, never                                                                         | 38%        | 24%        | 29%        |
| Yes, daily or weekly                                                              | 0%         | 17%        | 10%        |
| Yes, monthly                                                                      | <b>62%</b> | <b>59%</b> | <b>61%</b> |
